# Supplementary material
Source: PubMed Central journal article supplement (PMC3954497)
Supplement: jm401754x_si_001.pdf [file jm401754x_si_001.pdf]

## *Supporting Information*

### **Elucidating Structural Elements for Selectivity at Monoamine Transporters: Modafinil [(2-[(diphenylmethyl)sulfinyl] acetamide) Analogues**

*Oluyomi M. Okunola-Bakare,<sup>†</sup> Jianjing Cao,<sup>†</sup> Theresa Kopajtic,<sup>‡</sup> Jonathan L. Katz,<sup>‡</sup> Claus J. Loland,<sup>§</sup> Lei Shi,<sup>¶</sup> Amy Hauck Newman<sup>\*†</sup>*

<sup>†</sup>Medicinal Chemistry Section, and <sup>‡</sup>Psychobiology Section, Molecular Targets and Medications Discovery Branch, National Institute on Drug Abuse – Intramural Research Program, National Institutes of Health, Baltimore, Maryland, 333 Cassell Drive, Baltimore, Maryland 21224, United States

<sup>§</sup>Department of Neuroscience and Pharmacology, Faculty of Health and Medical Sciences, Copenhagen University, Copenhagen, Denmark

<sup>¶</sup>Department of Physiology and Biophysics and the Institute for Computational Biomedicine, Weill Medical College of Cornell University, New York, New York 10065, United States

#### **Supplemental information Contents:**

##### **I. Table S1. Microanalysis Data.....S2-S3**

**Table S1: Microanalysis Data:**

| Compd     | C          | H    | N    | C     | H    | N    |
|-----------|------------|------|------|-------|------|------|
|           | Calculated |      |      | Found |      |      |
| <b>4a</b> | 70.01      | 5.87 | 5.44 | 69.75 | 6.01 | 5.30 |
| <b>4e</b> | 55.23      | 4.02 | 4.29 | 55.61 | 4.40 | 3.88 |
| <b>4g</b> | 70.81      | 6.31 | 5.16 | 70.88 | 6.48 | 5.19 |
| <b>4h</b> | 56.48      | 4.44 | 4.12 | 56.29 | 4.58 | 4.12 |
| <b>4i</b> | 44.78      | 3.52 | 3.26 | 44.88 | 3.46 | 3.23 |
| <b>4j</b> | 72.69      | 6.44 | 4.71 | 72.39 | 6.59 | 4.60 |
| <b>4k</b> | 72.20      | 7.07 | 4.68 | 72.30 | 6.98 | 4.64 |
| <b>4l</b> | 64.46      | 5.71 | 4.18 | 64.18 | 5.78 | 4.10 |
| <b>4m</b> | 58.70      | 5.20 | 3.80 | 58.49 | 5.15 | 3.68 |
| <b>4n</b> | 47.28      | 4.19 | 3.06 | 47.50 | 4.26 | 3.16 |
| <b>4o</b> | 73.27      | 6.80 | 4.50 | 73.03 | 6.89 | 4.42 |
| <b>4p</b> | 65.68      | 5.51 | 4.03 | 65.41 | 5.40 | 4.02 |
| <b>4q</b> | 48.90      | 4.31 | 2.85 | 49.14 | 4.09 | 2.97 |
| <b>4r</b> | 72.39      | 7.42 | 4.44 | 72.52 | 7.44 | 4.47 |
| <b>4s</b> | 65.31      | 6.06 | 4.01 | 65.01 | 6.00 | 4.00 |
| <b>4t</b> | 48.43      | 4.49 | 2.97 | 48.70 | 4.51 | 3.10 |
| <b>4u</b> | 76.76      | 6.71 | 3.73 | 76.50 | 6.68 | 3.80 |
| <b>4v</b> | 70.05      | 5.63 | 3.40 | 69.97 | 5.74 | 3.34 |
| <b>4w</b> | 64.86      | 5.22 | 3.15 | 64.68 | 5.33 | 3.14 |
| <b>4x</b> | 54.05      | 4.35 | 2.63 | 54.50 | 4.29 | 2.66 |
| <b>4y</b> | 77.08      | 6.99 | 3.60 | 76.81 | 6.89 | 3.52 |
| <b>4z</b> | 54.86      | 4.60 | 2.56 | 55.10 | 4.72 | 2.60 |
| <b>5a</b> | 65.78      | 6.49 | 4.51 | 65.63 | 6.07 | 4.54 |
| <b>5b</b> | 48.81      | 3.37 | 3.35 | 48.85 | 3.00 | 3.32 |
| <b>5c</b> | 58.24      | 4.24 | 4.53 | 58.08 | 4.16 | 4.48 |
| <b>5d</b> | 52.64      | 3.83 | 4.09 | 52.58 | 3.73 | 3.92 |
| <b>5e</b> | 51.15      | 4.01 | 3.98 | 50.88 | 3.93 | 3.96 |
| <b>5f</b> | 63.87      | 6.20 | 4.66 | 64.15 | 5.83 | 4.63 |
| <b>5g</b> | 51.63      | 4.33 | 2.51 | 51.25 | 4.10 | 2.51 |
| <b>6a</b> | 63.74      | 6.00 | 4.51 | 64.14 | 5.97 | 4.50 |
| <b>6b</b> | 51.02      | 4.92 | 3.97 | 51.13 | 4.70 | 4.17 |
| <b>6c</b> | 41.17      | 3.69 | 3.20 | 41.09 | 3.83 | 3.30 |
| <b>6d</b> | 67.98      | 7.27 | 4.17 | 67.82 | 7.27 | 4.14 |
| <b>6e</b> | 64.75      | 6.99 | 3.60 | 64.72 | 6.83 | 3.52 |
| <b>6f</b> | 69.15      | 6.47 | 3.10 | 69.19 | 6.32 | 3.12 |
| <b>6g</b> | 64.05      | 5.58 | 2.87 | 63.96 | 5.75 | 2.87 |
| <b>6i</b> | 51.25      | 4.47 | 2.30 | 51.33 | 4.43 | 2.31 |
| <b>7a</b> | 58.44      | 5.48 | 4.01 | 58.18 | 5.55 | 3.99 |
| <b>7b</b> | 60.85      | 6.81 | 3.38 | 60.87 | 6.69 | 3.42 |
| <b>7c</b> | 62.01      | 5.40 | 2.78 | 61.98 | 5.29 | 2.79 |
| <b>7d</b> | 57.25      | 5.17 | 2.57 | 57.10 | 5.05 | 2.61 |

|    |       |      |      |       |      |      |
|----|-------|------|------|-------|------|------|
| 7e | 49.94 | 4.35 | 2.24 | 49.87 | 4.24 | 2.30 |
|----|-------|------|------|-------|------|------|
